# Supplementary material
Source: PubMed Central journal article supplement (PMC6408935)
Supplement: NIHMS999688-supplement-SI.pdf [file NIHMS999688-supplement-SI.pdf]

## Supporting Information

# Synthetic and Pre-clinical Characterization of a Cationic Iodinated Imaging Contrast Agent (CA4+) and Its Use for Quantitative Computed Tomography of *Ex Vivo* Human Hip Cartilage

*Rachel C. Stewart,<sup>†,‡</sup> Amit N. Patwa,<sup>§</sup> Hrvoje Lusic,<sup>§</sup> Jonathan D. Freedman,<sup>‡,§</sup> Michel Wathier,<sup>§</sup> Brian D. Snyder,<sup>\*,‡</sup> Ali Guermazi,<sup>\*,¶</sup> and Mark W. Grinstaff<sup>\*,†,§</sup>*

<sup>†</sup>Departments of Biomedical Engineering, Chemistry, and Medicine, Boston University, 590 Commonwealth Ave., Boston, Massachusetts 02215, United States <sup>‡</sup>Center for Advanced Orthopaedic Studies, Beth Israel Deaconess Medical Center and Harvard Medical School, 1 Overland Street, RN 115, Boston, Massachusetts 02215, United States <sup>§</sup>Department of Chemistry, Boston University, 590 Commonwealth Ave., Boston, Massachusetts 02215, United States <sup>¶</sup>Department of Radiology, Boston University School of Medicine, Boston, Massachusetts 02118, United States

### **Corresponding Author**

\*For B.D.S.: E-mail, [bsnyder@bidmc.harvard.edu](mailto:bsnyder@bidmc.harvard.edu). \*For A.G.: Tel, (+1)617-414-3893; E-mail, [guermazi@bu.edu](mailto:guermazi@bu.edu). \*For M.W.G.: Email, [mgrin@bu.edu](mailto:mgrin@bu.edu).

## **Contents**

| <b>Contents</b>                                                                                                                                                                                                                              | <b>Page No.</b> |
|----------------------------------------------------------------------------------------------------------------------------------------------------------------------------------------------------------------------------------------------|-----------------|
| Large scale synthesis and chemical characterization of CA4+-Cl <sup>-</sup> salt <b>5 (Scheme 1)</b>                                                                                                                                         | S3              |
| <sup>13</sup> C NMR of compound <b>2 (Figure S1)</b>                                                                                                                                                                                         | S4              |
| <sup>1</sup> H and <sup>13</sup> C NMR of compound <b>3 (Figure S2, S3)</b>                                                                                                                                                                  | S4-S5           |
| <sup>1</sup> H and <sup>13</sup> C NMR of compound <b>4 (Figure S4, S5)</b>                                                                                                                                                                  | S5-S6           |
| <sup>1</sup> H, <sup>19</sup> F and <sup>13</sup> C NMR of compound <b>5a (Figure S6, S7, S8)</b>                                                                                                                                            | S6-S7           |
| <sup>1</sup> H, <sup>13</sup> C and <sup>19</sup> F NMR of compound <b>5 (Figure S9, S10, S11)</b>                                                                                                                                           | S8-S9           |
| HPLC analysis of compound <b>5 (Figure S12)</b>                                                                                                                                                                                              | S9              |
| HRMS spectrum of compound <b>5 (Figure S13)</b>                                                                                                                                                                                              | S10             |
| <b>Table S1.</b> Procedural differences between the previous synthesis of CA4+ (ref 46) and the current large scale synthesis of CA4+                                                                                                        | S11             |
| Diffusion of Contrast Agents and DMMB assay ( <b>Table S2, Table S3 and Figure S14</b> )                                                                                                                                                     | S12-S13         |
| Individual clinical chemistry parameters ( <b>Table S4</b> )                                                                                                                                                                                 | S14             |
| Individual clinical chemistry parameters ( <b>Table S5</b> )                                                                                                                                                                                 | S15             |
| Normal values, Sprague Dawley 15-16 weeks old males (N = 20) ( <b>Table S6</b> )                                                                                                                                                             | S16             |
| Clinical Chemistry parameters (normal values, Sprague Dawley 15-16 weeks old females (N = 20)) ( <b>Table S7</b> )                                                                                                                           | S17             |
| Technical data sheet for <sup>14</sup> C-CA4+ chloride salt <b>5*</b> (Radioflow chromatogram (for radiochemical purity) and PDA chromatogram (for chemical purity) for <sup>14</sup> C-CA4+ chloride salt <b>5*</b> ) ( <b>Figure S15</b> ) | S18             |

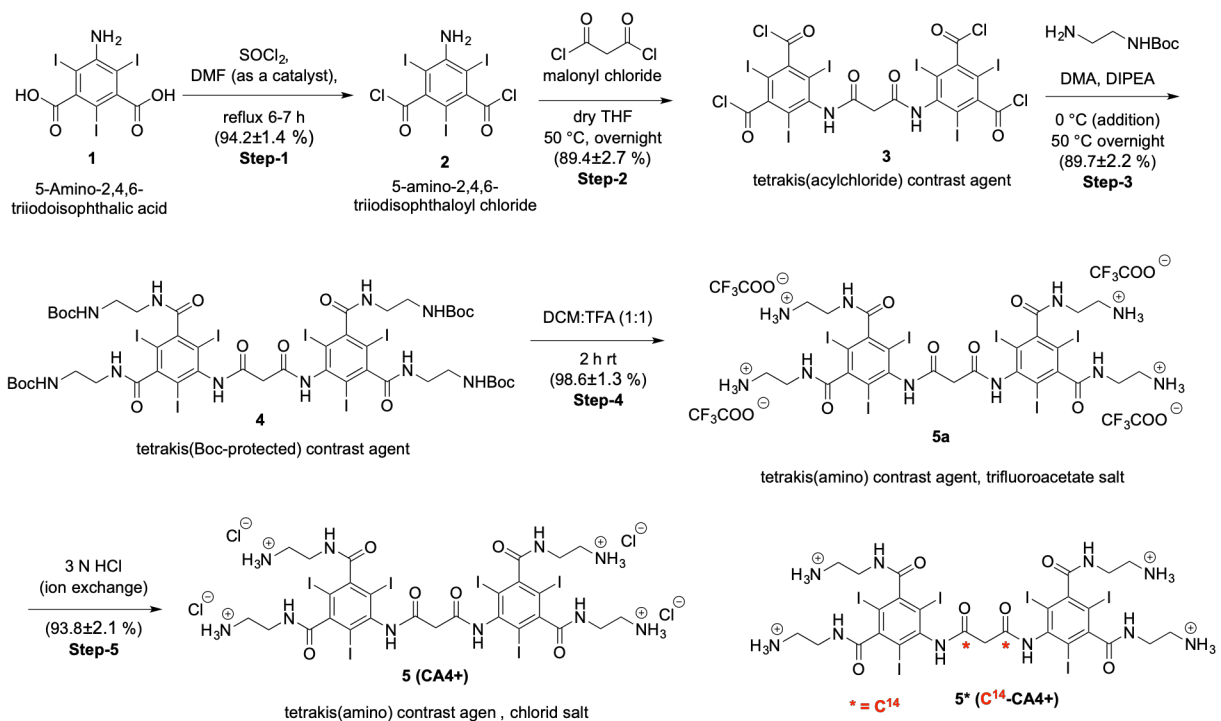

**Scheme 1.** Large scale synthesis of chloride salt of CA4+ 5.

Alternative method for the synthesis of 5-amino-2,4,6-triiodoisophthaloyl chloride **2**: Compound **2** was synthesized using ethylene dichloride as a solvent and only four equivalents of thionyl chloride. After quenching the thionyl chloride with ice-cold water, the ethylene dichloride layer (highly concentrated) was separated. The aqueous layer was extracted twice with dichloromethane, and the combined organic layers were washed and concentrated to obtain **2** in 96.3 % yield (this reaction was repeated twice). We have successfully synthesized **2** using both procedures and found that the workup is more convenient and simple in the first case (thionyl chloride as a reagent and solvent) than the alternative procedure because of the tedious workup using the chlorinated solvent and poor visual separation of the two layers.

## NMR Spectra

Scanned NMR spectra of the synthesized compounds **2**, **3**, **4**, **5a**, and **5**. All spectra were recorded by Agilent 500 MHz VNMRs spectrometer with a Varian ultra-shielded magnet at 500 MHz for <sup>1</sup>H NMR, 470 MHz for <sup>19</sup>F NMR, 125 MHz for <sup>13</sup>C NMR:

## NMR Spectra

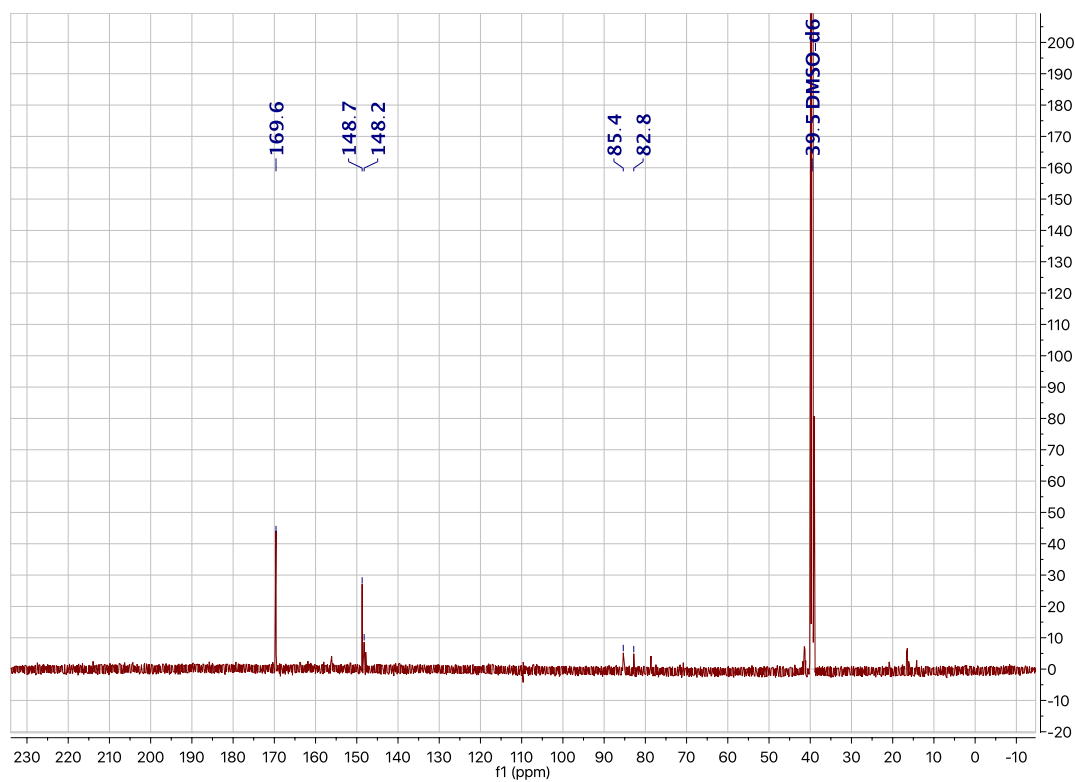

**Figure S1.**  $^{13}\text{C}$  NMR of 5-amino-2,4,6-triiodoisophthaloyl chloride **2**

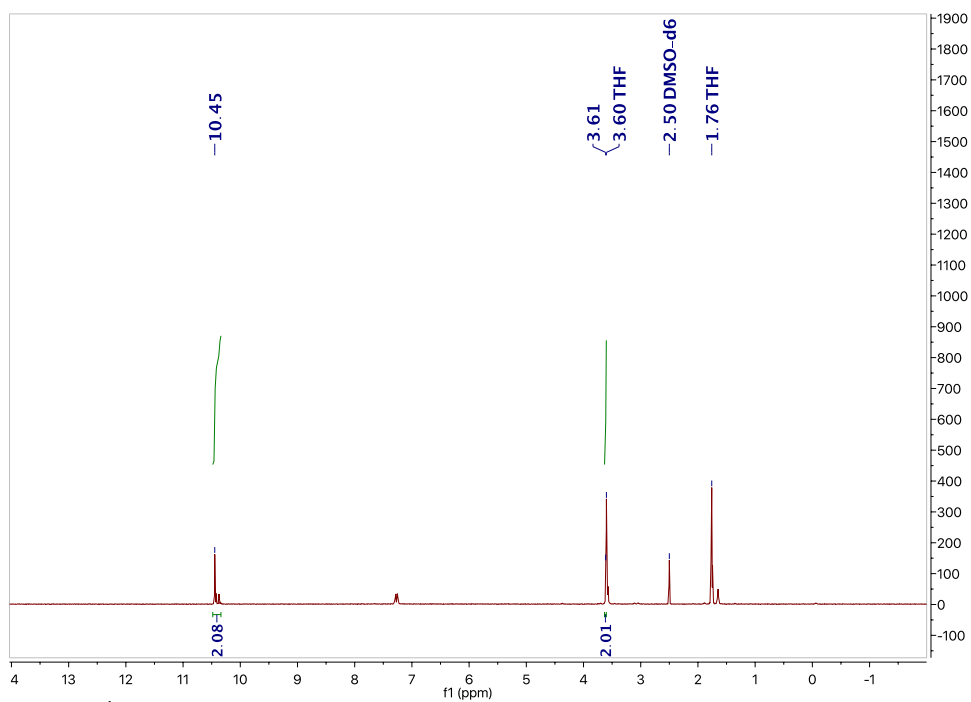

**Figure S2.**  $^1\text{H}$  NMR of 5,5'-[malonylbis(azanediyl)]bis(2,4,6-triiodoisophthaloyl dichloride) **3**

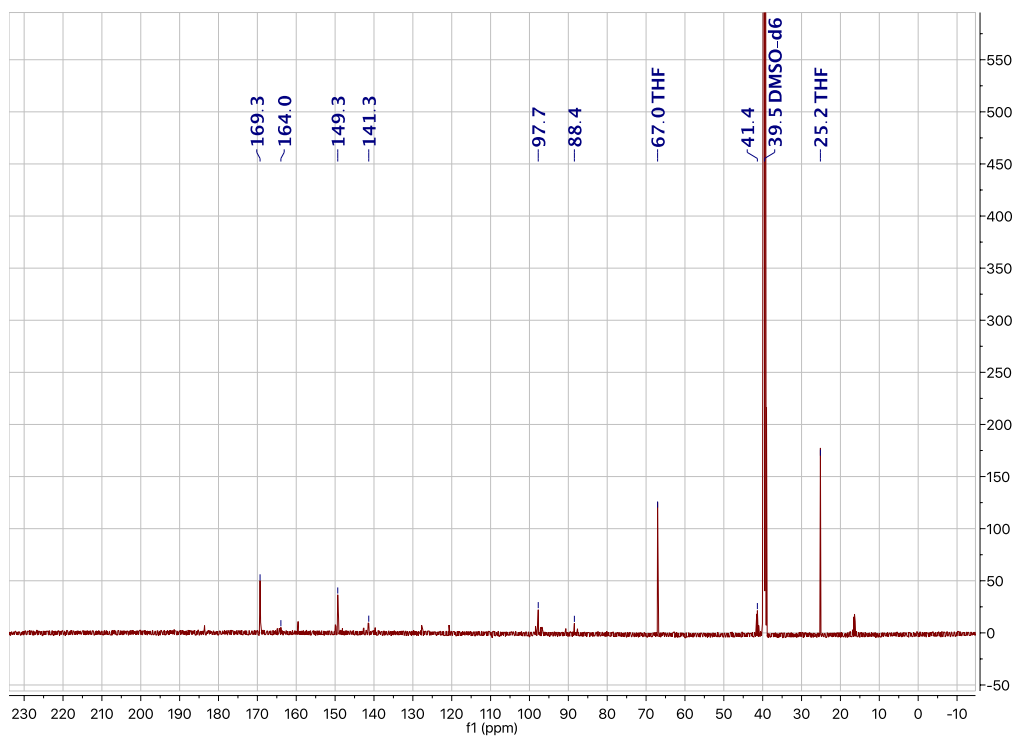

**Figure S3.**  $^{13}\text{C}$  NMR of 5,5'-[malonylbis(azanediy)]bis(2,4,6-triiodoisophthaloyl dichloride) **3**

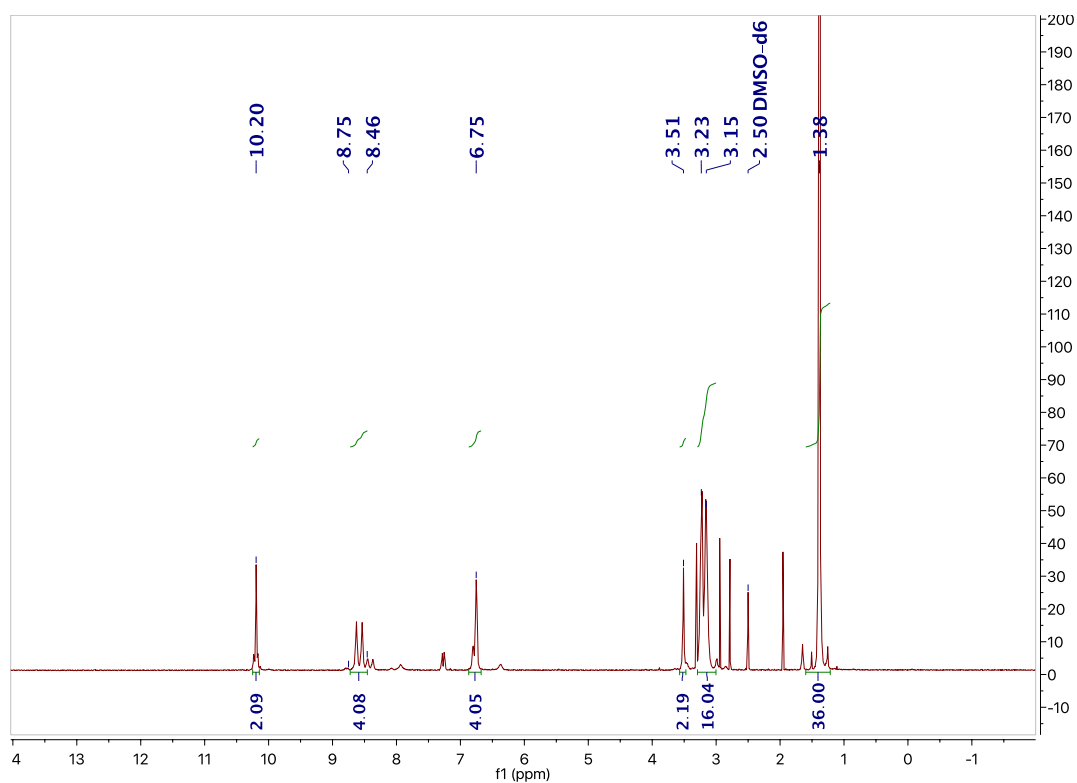

**Figure S4.**  $^1\text{H}$  NMR of tetra-*tert*-butyl [(5,5'-[malonylbis(azanediy)]bis(2,4,6-triiodoisophthaloyl)]tetrakis(azanediy)]tetrakis(ethane-2,1-diyl)]tetracarbamate **4**

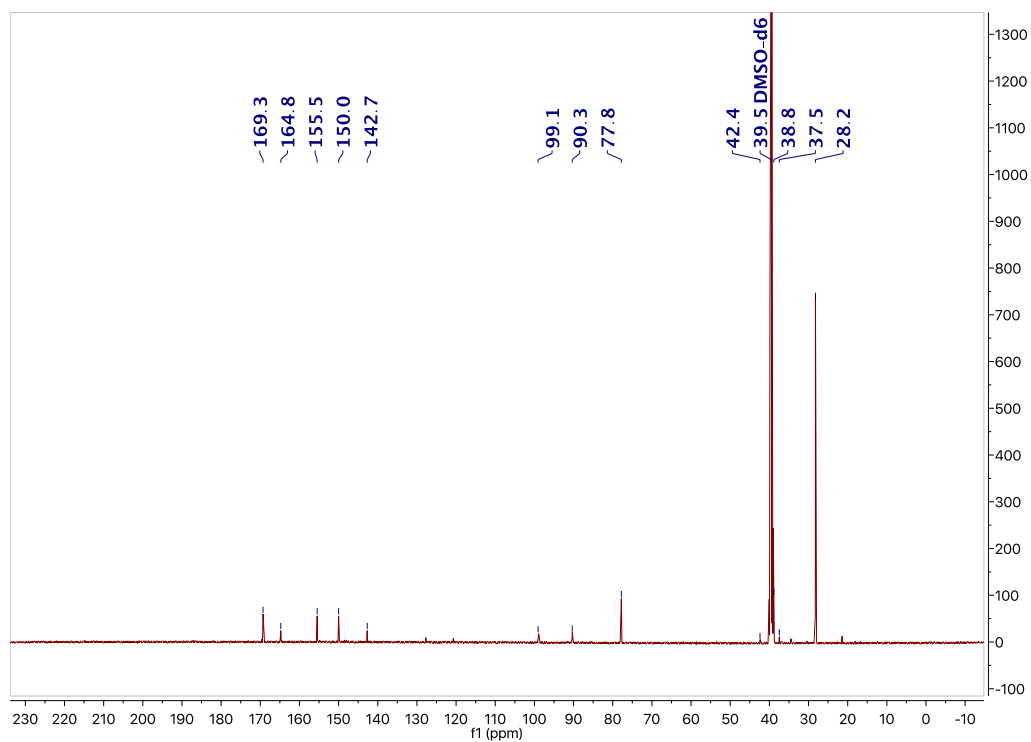

**Figure S5.**  $^{13}\text{C}$  NMR of tetra-*tert*-butyl [(5,5'-[malonylbis(azanediy)]bis(2,4,6-triiodoisophthaloyl))tetrakis(azanediy)]tetrakis(ethane-2,1-diyl)tetracarbamate **4**

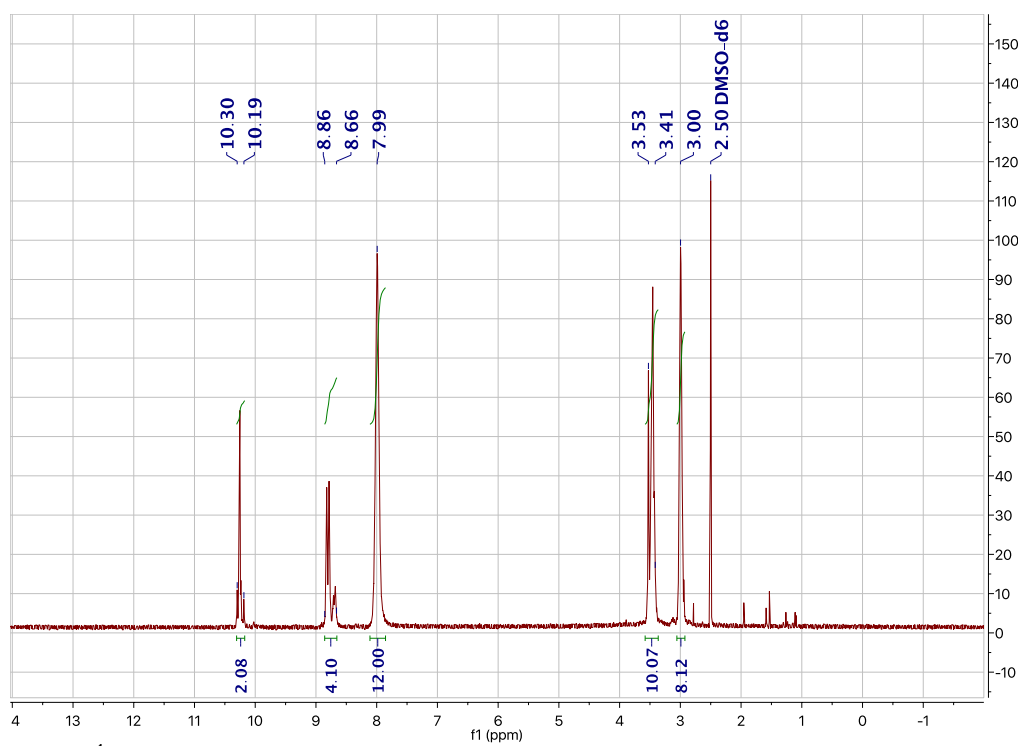

**Figure S6.**  $^1\text{H}$  NMR of 5,5'-[malonylbis(azanediy)]bis[*N*1,*N*3-bis(2-aminoethyl)-2,4,6-triiodoisophthalamide] TFA salt **5a**

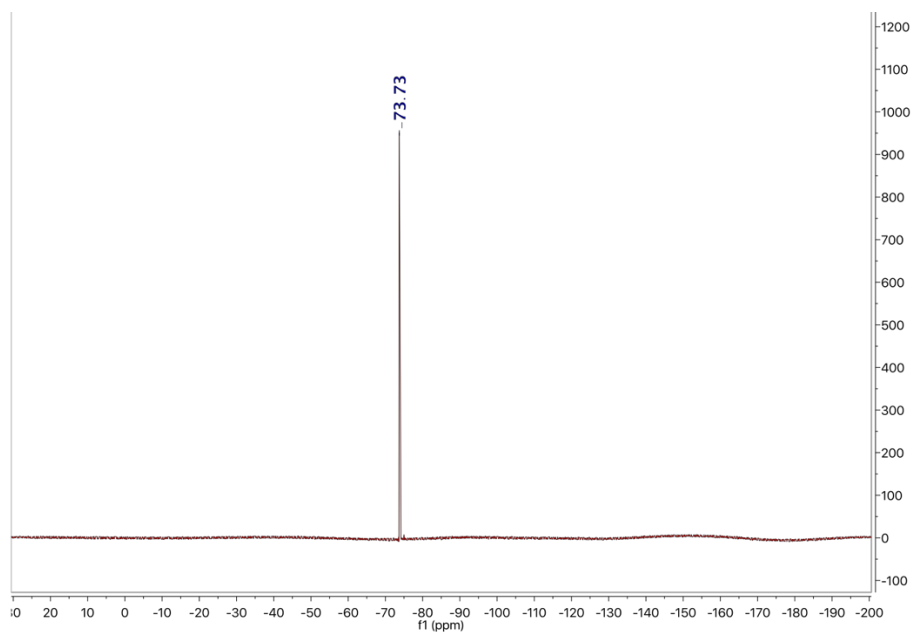

**Figure S7.**  $^{19}\text{F}$  NMR spectra of 5,5'-[malonylbis(azanediy)]bis[*N1,N3*-bis(2-aminoethyl)-2,4,6-triodoisophthalamide] TFA salt **5a**

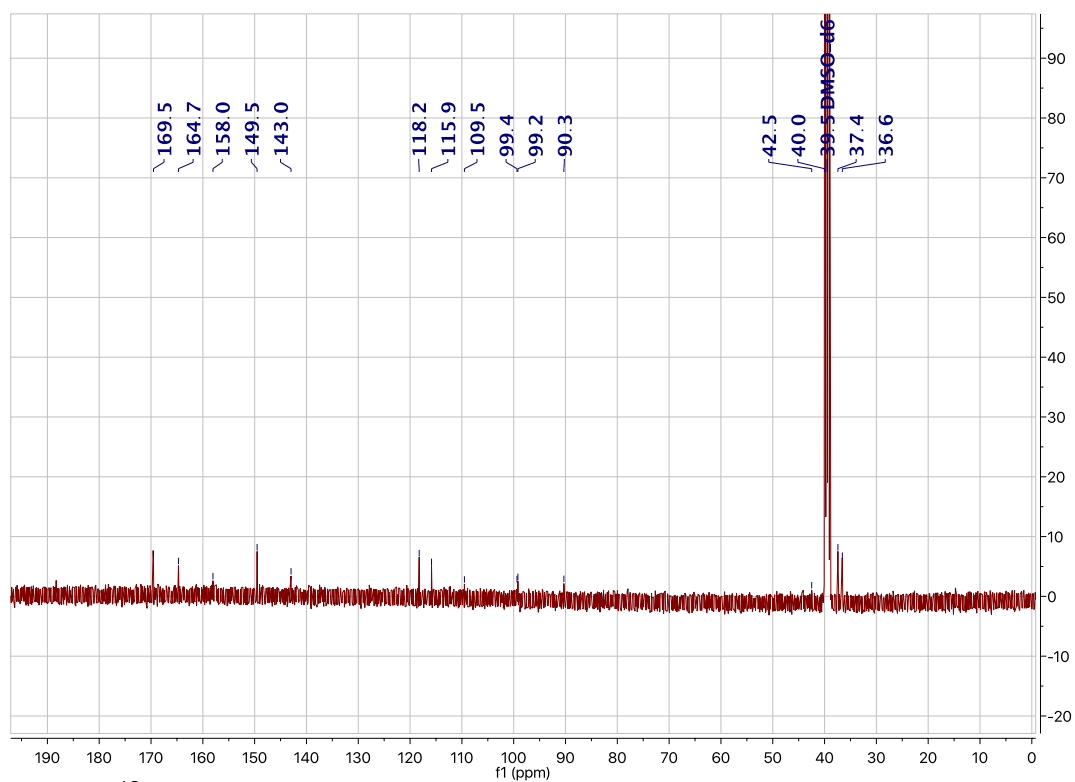

**Figure S8.**  $^{13}\text{C}$  NMR of 5,5'-[malonylbis(azanediy)]bis[*N1,N3*-bis(2-aminoethyl)-2,4,6-triodoisophthalamide] TFA salt **5a**

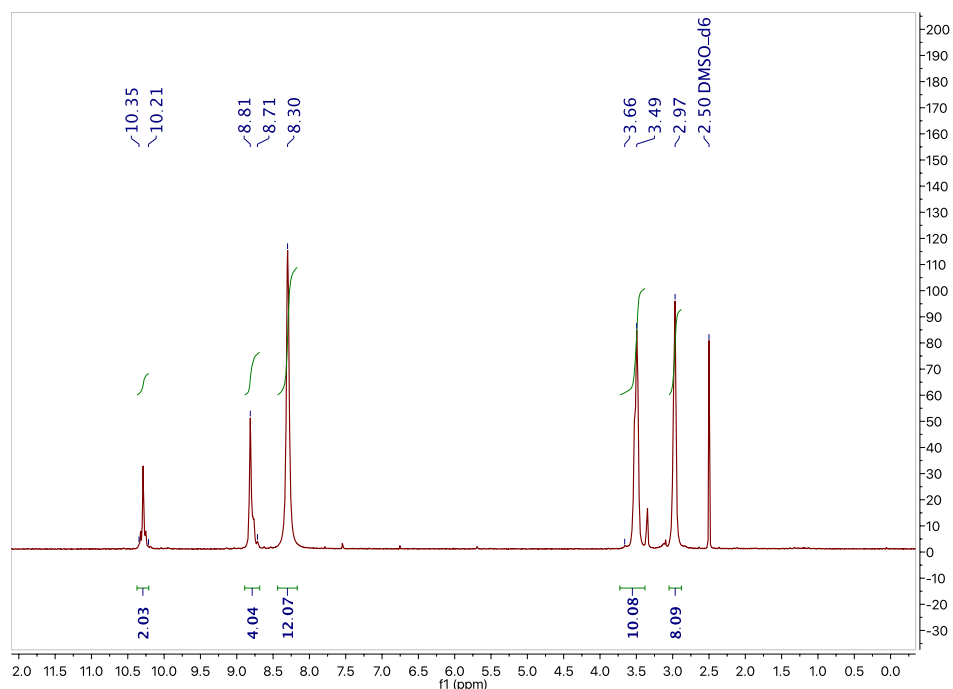

**Figure S9.**  $^1\text{H}$  NMR of 5,5'-[malonylbis(azanediy)]bis[*N*1,*N*3-bis(2-aminoethyl)-2,4,6-triiodoisophthalamide] chloride salt **5**

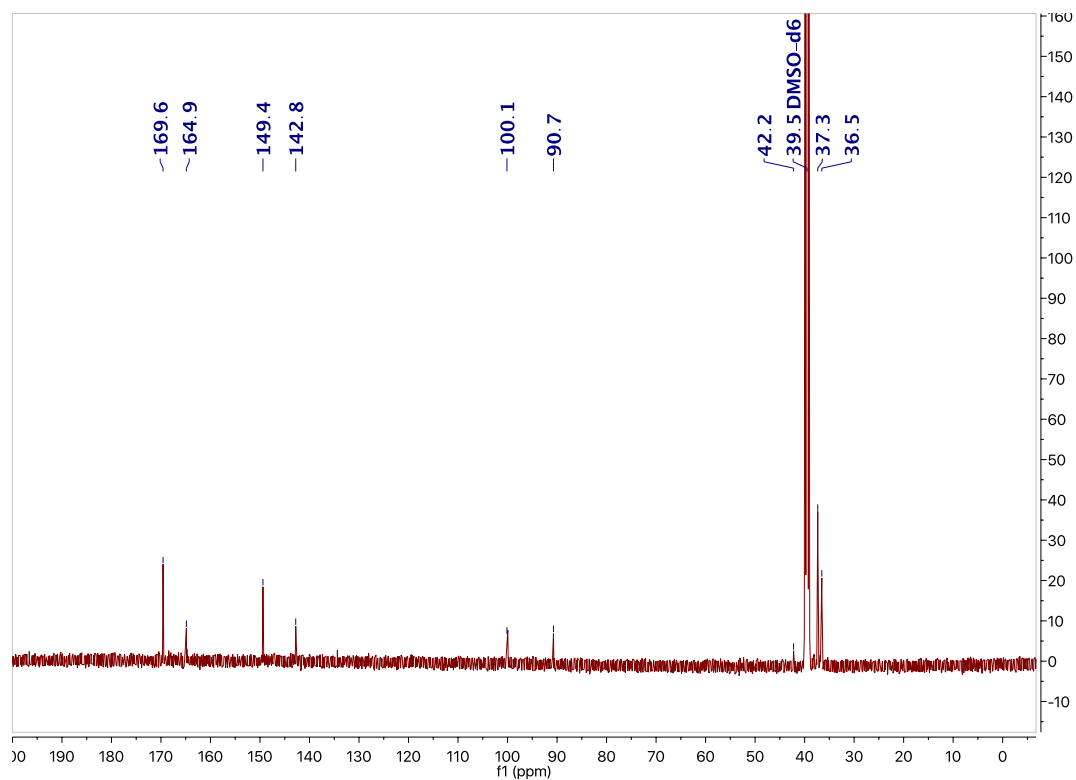

**Figure S10.**  $^{13}\text{C}$  NMR of 5,5'-[malonylbis(azanediy)]bis[*N*1,*N*3-bis(2-aminoethyl)-2,4,6-triiodoisophthalamide] chloride salt **5**



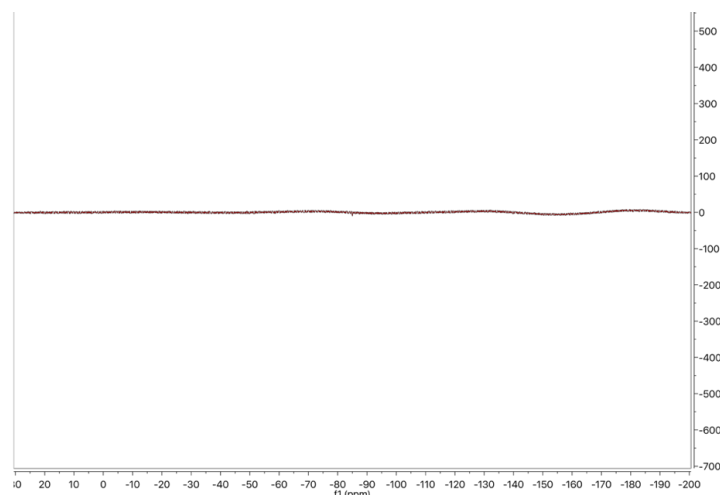

**Figure S11.**  $^{19}\text{F}$  NMR spectra of 5,5'-[malonylbis(azanediy)]bis[*N*1,*N*3-bis(2-aminoethyl)-2,4,6-triiodoisophthalamide] chloride salt **5**

HPLC analysis of 5,5'-[malonylbis(azanediy)]bis[*N*1,*N*3-bis(2-aminoethyl)-2,4,6-triiodoisophthalamide] chloride salt **5** (CA4+)

The purity of **5** salt was determined by analytical reverse-phase HPLC. Briefly, a Varian ProStar HPLC pump and UV-vis detector with Hamilton C18 HxSil 5mm 250x4.6 mm column was used with 1 mL/min flow rate of 95/5 water/ACN (isocratic). Product **5** was detected as a single peak at 245 nm with a retention time of 2.5 minutes. Shelf life of CA4+ **5** powder and aqueous solution of CA4+ **5** (12 or 24 mg/ml, pH=7.4, 400 mOsm/kg), was determined by recording HPLC profile after one year. Both, CA4+ **5** powder and its aqueous solution remain unaltered (eluted as single peak at the same retention time) when stored for one year in refrigerator (+4 °C). CA4+ **5** powder can be stored unaltered even at room temperature for a year.

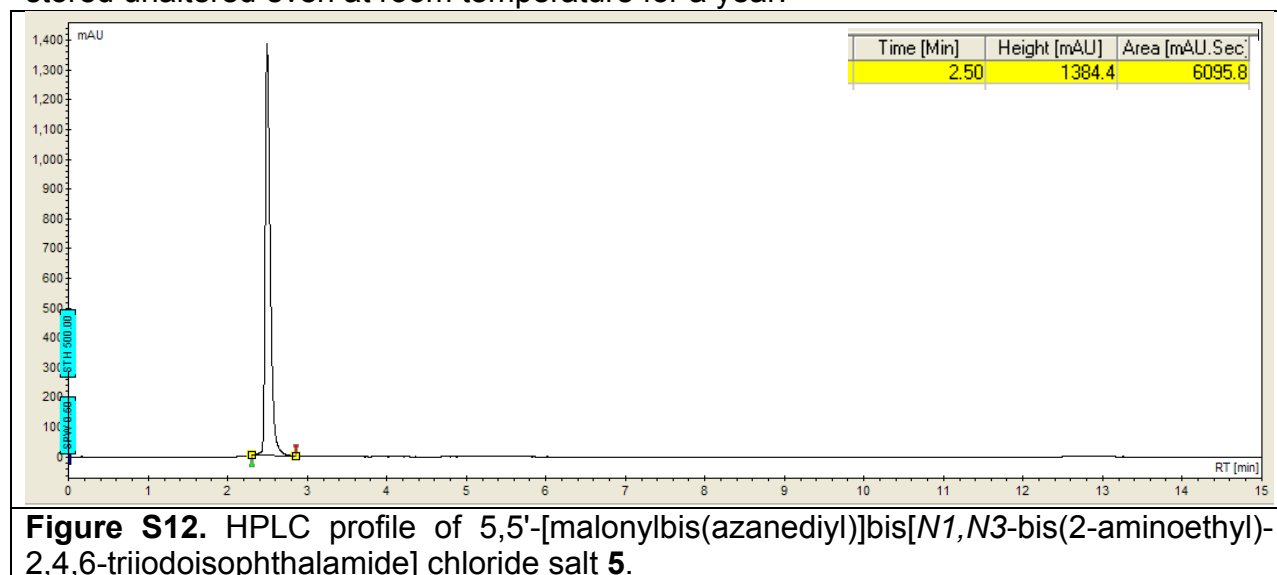

**Figure S12.** HPLC profile of 5,5'-[malonylbis(azanediy)]bis[*N*1,*N*3-bis(2-aminoethyl)-2,4,6-triiodoisophthalamide] chloride salt **5**.

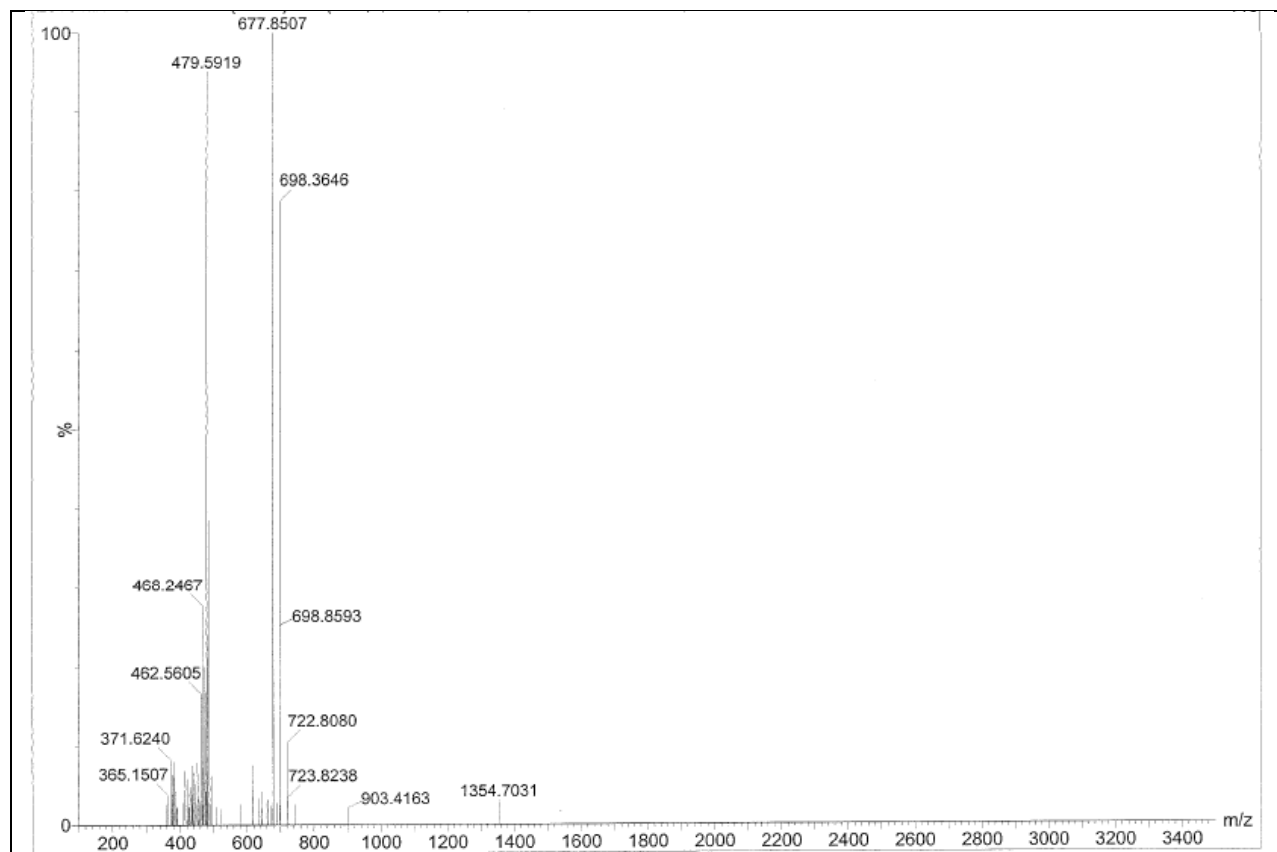

**Figure S13.** HRMS spectrum of 5,5'-[malonylbis(azanediy)]bis[N1,N3-bis(2-aminoethyl)-2,4,6-triiodoisophthalamide] chloride salt **5**.

**Table S1.** Procedural differences between the previous synthesis of CA4+ (ref 45) and the current large scale synthesis of CA4+

|                                  | Old procedure<br>(SI of Reference 46)                                                                                                                                                                                                                                                                                                                                                                 | New procedure<br>(This manuscript)                                                                                                                                                                                                                                                                                                                                                                                                            |
|----------------------------------|-------------------------------------------------------------------------------------------------------------------------------------------------------------------------------------------------------------------------------------------------------------------------------------------------------------------------------------------------------------------------------------------------------|-----------------------------------------------------------------------------------------------------------------------------------------------------------------------------------------------------------------------------------------------------------------------------------------------------------------------------------------------------------------------------------------------------------------------------------------------|
| Step-1<br>Synthesis of <b>2</b>  | <ul style="list-style-type: none"> <li><input type="checkbox"/> 3 g scale</li> <li><input type="checkbox"/> 30 equiv. thionyl chloride used</li> <li><input type="checkbox"/> removal of thionyl chloride on rotary evaporator (handling is difficult on large scale)</li> <li><input type="checkbox"/> excess use of ethyl acetate for extraction (50 mL/g of starting material <b>1</b>)</li> </ul> | <ul style="list-style-type: none"> <li><input type="checkbox"/> 150 g scale</li> <li><input type="checkbox"/> 19.1 equiv. thionyl chloride used</li> <li><input type="checkbox"/> quenching of thionyl chloride (easy to handle)</li> <li><input type="checkbox"/> Use of ethyl acetate is almost one third (15 mL/g of starting material <b>1</b>) of previous usage</li> <li><input type="checkbox"/> Work-up is more convenient</li> </ul> |
| Step-2<br>Synthesis of <b>3</b>  | <ul style="list-style-type: none"> <li><input type="checkbox"/> Use of excess of hexanes for precipitation</li> <li><input type="checkbox"/> Yield was 60-65 %</li> <li><input type="checkbox"/> Pale yellow solid</li> </ul>                                                                                                                                                                         | <ul style="list-style-type: none"> <li><input type="checkbox"/> Precipitation was achieved by cooling at -20 °C</li> <li><input type="checkbox"/> Yield 89 %</li> <li><input type="checkbox"/> White solid (better purity than previous procedure)</li> </ul>                                                                                                                                                                                 |
| Step-3<br>Synthesis of <b>4</b>  | <ul style="list-style-type: none"> <li><input type="checkbox"/> Excess use of DMA (6 mL/g of <b>3</b>)</li> <li><input type="checkbox"/> Removal of DMA on rotary evaporator is very tedious (because of high boiling point of DMA)</li> <li><input type="checkbox"/> Use of excess of hexanes for precipitation</li> <li><input type="checkbox"/> Yield 61 %</li> </ul>                              | <ul style="list-style-type: none"> <li><input type="checkbox"/> Use of DMA is half (3 mL/g of <b>3</b>) of previous usage</li> <li><input type="checkbox"/> No removal of DMA, precipitation in 1 mol/L aqueous HCl</li> <li><input type="checkbox"/> Removal of all excess reagent and bases through filtration</li> <li><input type="checkbox"/> Yield 89 %</li> </ul>                                                                      |
| Step-4<br>Synthesis of <b>5a</b> | <ul style="list-style-type: none"> <li><input type="checkbox"/> Use of excess of DCM:TFA (1:1) mixture</li> <li><input type="checkbox"/> Removal of DCM:TFA on rotary evaporator</li> <li><input type="checkbox"/> Product <b>5a</b> was obtained as glassy solid</li> </ul>                                                                                                                          | <ul style="list-style-type: none"> <li><input type="checkbox"/> Usage of DCM:TFA (1:1) only 3.5 mL/g of <b>4</b></li> <li><input type="checkbox"/> No use of rotary evaporator, product <b>5a</b> was precipitated out from ether</li> <li><input type="checkbox"/> Product <b>5a</b> was obtained as white free flow solid (easy to handle)</li> </ul>                                                                                       |
| Step-5<br>Synthesis of <b>5</b>  | <ul style="list-style-type: none"> <li><input type="checkbox"/> Lyophilization method was used</li> <li><input type="checkbox"/> Procedure was not optimized; yield was not measured</li> </ul>                                                                                                                                                                                                       | <ul style="list-style-type: none"> <li><input type="checkbox"/> Lyophilization was not convenient on larger scale, CA4+ <b>5</b> was precipitated from Acetone</li> <li><input type="checkbox"/> Optimization of the procedure and yield is more than 93 % (isolated)</li> </ul>                                                                                                                                                              |

### **Diffusion of Contrast Agents**

Cationic, anionic and neutral contrast agents were diffused into six osteochondral plugs over 48 hours. Each contrast agent diffusion series was fit to the model:

$$CECT \text{ Attenuation} = \alpha(1 - e^{-\frac{t}{\tau}}) \text{ (Equation 1).}$$

**Table S2.** Equilibrium Attenuation and Time Constants as Fit to **Equation 1**.

| Contrast Agent | Maximum attenuation ( $\alpha$ ) (HU) | Equilibrium attenuation ( $0.95\alpha$ ) (HU) | Time constant ( $\tau$ ) (hours) | Time required to reach equilibrium ( $t = 3\tau$ ) (hours) |
|----------------|---------------------------------------|-----------------------------------------------|----------------------------------|------------------------------------------------------------|
| CA4            | 2417                                  | 2291.15                                       | 12.5                             | 37.5                                                       |
| Iodixanol      | 2053                                  | 1950.35                                       | 3.91                             | 11.73                                                      |
| Ioxaglate      | 1918                                  | 1822.1                                        | 3.03                             | 9.09                                                       |

### **1,9-dimethylmethylene blue (DMMB) assay for glycosaminoglycan (GAG) content**

A buffer solution of 50 mM sodium phosphate, 5 mM EDTA, 2 mM dithiothreitol (DTT), pH 6.8 was prepared for all solutions in this section. The cartilage was excised from the subchondral bone using a scalpel (#22 blade). Care was taken to remove all of the cartilage tissue by gently brushing the scalpel against the subchondral bone. The wet weight of the cartilage was measured, followed by lyophilization for 12 hours and then the dry weight of the cartilage was measured. Dry samples were digested in papain (0.5 mg/mL in the buffer solution) at 65 °C for 24 h. The GAG content of each cartilage sample was determined using the 1,9-dimethylmethylene blue (DMMB) colorimetric assay. A linear calibration curve (absorbance vs. GAG) was generated using concentrations of chondroitin-4-sulfate (Sigma 27042, St. Louis, MO) ranging from 10 to 100 mg/mL in the buffer solution. Each cartilage digestion solution was diluted 40 to 60 times for the assay. In triplicate, ten microliters of each chondroitin-4-sulfate calibration solution and each diluted sample digestion solution were added and mixed with 100  $\mu$ L of DMMB dye solution in a 96-well plate. The absorbance (520 nm) was measured using a plate reader (Beckman Coulter AD340, Fullerton, CA). The total GAG mass of each sample was calculated using the calibration curve and a GAG concentration was computed by dividing the total GAG mass (mg) by the wet weight (mg) of the cartilage.

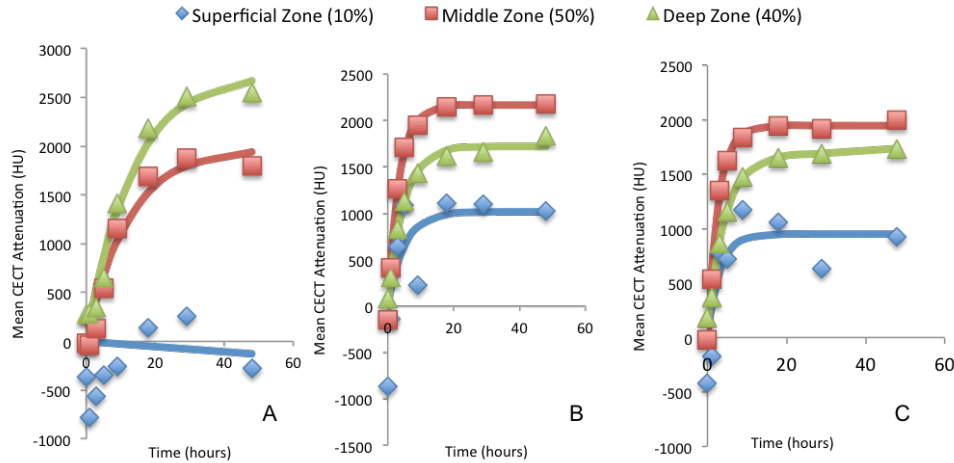

**Figure S14.** Diffusion and partition of loxaglate, Iodixanol and CA4+ into bovine osteochondral plugs divided into superficial, middle and deep zones of cartilage.

Contrast agents with different valence charges were diffused into bovine osteochondral plugs (n = 6) over 48 hours: **(A)** CA4+ with +4 valence, **(B)** Iodixanol, a neutral agent, and **(C)** loxaglate with a -1 valence. The cartilage was segmented into three different zones: superficial zone (top 10% from articular surface), middle zone (middle 50%) and deep (40% from bone-cartilage interface). Both Iodixanol and loxaglate appear to diffuse throughout the cartilage tissue with the greatest contribution from the middle zone and secondarily from the deep zone of cartilage with a lesser contribution from the superficial zone. For CA4+, the main zone of highest attenuation is the deep zone followed by the middle zone, with no significant contribution from the superficial zone.

The attenuation and equilibrium time calculated from **Equation 1** is summarized for each cartilage zone in **Table S2**.

**Table S3.** Equilibrium Attenuation and Time Constants as Fit to **Equation 1** by Zone of Cartilage.

| Contrast Agent |                        | Maximum attenuation ( $\alpha$ ) (HU) | Equilibrium attenuation ( $0.95\alpha$ ) (HU) | Time constant ( $\tau$ ) (hours) | Time required to reach equilibrium ( $t = 3\tau$ ) (hours) |
|----------------|------------------------|---------------------------------------|-----------------------------------------------|----------------------------------|------------------------------------------------------------|
| CA4+           | Superficial Zone (10%) | -40350                                | -38332.50                                     | 15200                            | 45510                                                      |
|                | Middle Zone (50%)      | 1979                                  | 1880.05                                       | 12.21                            | 36.63                                                      |
|                | Deep Zone (40%)        | 2745                                  | 2607.75                                       | 13.37                            | 40.11                                                      |
| Iodixanol      | Superficial Zone (10%) | 1017                                  | 966.15                                        | 4.97                             | 14.92                                                      |
|                | Middle Zone (50%)      | 2167                                  | 2085.65                                       | 3.54                             | 10.61                                                      |
|                | Deep Zone (40%)        | 1721                                  | 1634.95                                       | 4.79                             | 14.36                                                      |
| Ioxaglate      | Superficial Zone (10%) | 950                                   | 902.60                                        | 3.07                             | 9.21                                                       |
|                | Middle Zone (50%)      | 1946                                  | 1848.70                                       | 2.76                             | 8.27                                                       |
|                | Deep Zone (40%)        | 1700                                  | 1615.00                                       | 4.31                             | 12.92                                                      |

**Table S4.** Individual clinical chemistry parameters

|         | Sex    | Na<br>(mmol/L) | K<br>(mmol/L) | Cl<br>(mmol/L) | Calcium 2<br>(mmol/L) | TG<br>(mg/dL) | CHOL<br>(mg/dL) | TP<br>(g/dL) | ALB<br>(g/dL) | GLOB<br>(g/dL) | A/G | TB<br>(mg/dL) |
|---------|--------|----------------|---------------|----------------|-----------------------|---------------|-----------------|--------------|---------------|----------------|-----|---------------|
| Group 1 | Male   | 143            | 10.59         | 98.4           | 12.2                  | 44            | 99              | 7.0          | 4.4           | 3              | 2   | 0.1           |
|         | Male   | 141            | 12.00         | 96.5           | 13.0                  | 30            | 97              | 7.4          | 4.8           | 3.0            | 2   | 0.1           |
|         | Male   | 140            | 11.08         | 95.1           | 14.0                  | 60            | 108             | 8.1          | 5.2           | 3.0            | 2   | 0.1           |
|         | Female | 139            | 14.23         | 98.7           | 11.9                  | 48            | 94              | 7.1          | 4.7           | 2.0            | 2   | 0.1           |
|         | Female | 139            | 13.13         | 97.2           | 12.3                  | 54            | 109             | 7.1          | 4.9           | 2.0            | 2   | 0.1           |
|         | Female | 141            | 11.74         | 95.4           | 12.6                  | 59            | 151             | 7.7          | 4.9           | 3.0            | 2   | 0.1           |
| Group 2 | Male   | 141            | 11.20         | 97.0           | 12.6                  | 42            | 114             | 7.5          | 4.9           | 3.0            | 2   | 0.1           |
|         | Male   | 140            | 10.94         | 94.6           | 13.7                  | 81            | 156             | 7.6          | 4.8           | 3.0            | 2   | 0.1           |
|         | Male   | 143            | 9.88          | 93.6           | 14.4                  | 64            | 129             | 8.5          | 5.5           | 3.0            | 2   | 0.1           |
|         | Female | 136            | 16.32         | 97.6           | 12.7                  | 57            | 95              | 7.1          | 5.0           | 2.0            | 2   | 0.1           |
|         | Female | 138            | 14.54         | 98.2           | 12.8                  | 48            | 105             | 7.5          | 5.0           | 3.0            | 2   | 0.1           |
|         | Female | 143            | 10.88         | 97.8           | 13.7                  | 48            | 141             | 8.0          | 5.4           | 3.0            | 2   | 0.1           |
| Group 3 | Male   | 139            | 9.98          | 91.5           | 15.1                  | 64            | 131             | 9.4          | 5.9           | 4.0            | 2   | 0.1           |
|         | Male   | 144            | 9.38          | 92.4           | 14.6                  | 88            | 156             | 8.6          | 5.3           | 3.0            | 2   | 0.1           |
|         | Male   | 139            | 12.82         | 95.7           | 13.8                  | 63            | 115             | 8.2          | 5.2           | 3.0            | 2   | 0.1           |
|         | Female | 138            | 13.66         | 98.9           | 12.6                  | 50            | 145             | 7.6          | 5.4           | 2.0            | 2   | 0.1           |
|         | Female | 139            | 12.87         | 97.9           | 12.3                  | 45            | 125             | 7.2          | 4.9           | 2.0            | 2   | 0.1           |
|         | Female | 139            | 11.96         | 96.9           | 12.9                  | 60            | 146             | 7.6          | 5.2           | 2.0            | 2   | 0.1           |
| Group 4 | Male   | 139            | 12.96         | 94.8           | 13.0                  | 69            | 120             | 7.4          | 4.6           | 3.0            | 2   | 0.1           |
|         | Male   | 141            | 11.44         | 95.9           | 14.2                  | 58            | 129             | 7.8          | 4.8           | 3.0            | 2   | 0.1           |
|         | Male   | 144            | 10.13         | 93.4           | 16.6                  | 84            | 152             | 10.1         | 6.8           | 4.0            | 2   | 0.1           |
|         | Female | 137            | 12.25         | 97.7           | 12.5                  | 70            | 121             | 6.8          | 4.7           | 2.0            | 2   | 0.1           |
|         | Female | 140            | 10.81         | 96.7           | 13.8                  | 73            | 133             | 8.4          | 5.6           | 3.0            | 2   | 0.1           |
|         | Female | 142            | 11.03         | 97.2           | 13.3                  | 58            | 166             | 8.4          | 5.6           | 3              | 2   | 0.1           |

Na = Sodium  
 K = Potassium  
 Cl = Chloride  
 TG = Triglycerides

TB = Total Bilirubin  
 ALB = Albumin  
 TP = Total Protein  
 Ca = Calcium

GLOB = Globulin (= TP- ALB)  
 A/G = Alb/Glob ratio  
 CHOL = Cholesterol

**Table S5.** Individual clinical chemistry parameters

|         | Sex    | PHOS<br>(mg/dL) | GLU<br>(mg/dL) | BUN<br>(mg/dL) | CREAT<br>(mg/dL) | ALK<br>(U/L) | ALT<br>(U/L) | AST<br>(U/L) | GGT<br>(U/L) | Lipemia | Hemolysis | Icteric |
|---------|--------|-----------------|----------------|----------------|------------------|--------------|--------------|--------------|--------------|---------|-----------|---------|
| Group 1 | Male   | 14.8            | 154            | 21             | 0.41             | 105          | 58           | 93           | -3           | 11      | 32        | 0       |
|         | Male   | 16.3            | 145            | 19             | 0.36             | 108          | 82           | 126          | -2           | 6       | 25        | 0       |
|         | Male   | 15.1            | 199            | 16             | 0.38             | 159          | 81           | 136          | -2           | 9       | 24        | 0       |
|         | Female | 12.5            | 90             | 20             | 0.45             | 56           | 68           | 131          | -3           | 5       | 54        | 0       |
|         | Female | 12.6            | 92             | 17             | 0.41             | 53           | 56           | 83           | -2           | 7       | 24        | 0       |
|         | Female | 12.8            | 83             | 18             | 0.43             | 73           | 62           | 102          | -2           | 11      | 27        | 0       |
| Group 2 | Male   | 13.2            | 223            | 23             | 0.38             | 119          | 93           | 97           | -3           | 10      | 27        | 0       |
|         | Male   | 12.4            | 282            | 18             | 0.36             | 145          | 67           | 85           | -1           | 8       | 18        | 0       |
|         | Male   | 14.3            | 258            | 18             | 0.40             | 140          | 63           | 81           | -1           | 4       | 16        | 0       |
|         | Female | 15.4            | 75             | 19             | 0.47             | 79           | 73           | 114          | -2           | 7       | 24        | 0       |
|         | Female | 13.8            | 153            | 19             | 0.44             | 61           | 59           | 92           | -4           | 7       | 85        | 0       |
|         | Female | 14.2            | 87             | 19             | 0.42             | 81           | 53           | 101          | -1           | 10      | 20        | 0       |
| Group 3 | Male   | 13.4            | 306            | 23             | 0.43             | 148          | 82           | 105          | -2           | 8       | 21        | 0       |
|         | Male   | 14.1            | 274            | 17             | 0.36             | 117          | 59           | 93           | -1           | 9       | 16        | 0       |
|         | Male   | 14.2            | 156            | 20             | 0.35             | 145          | 93           | 125          | -2           | 8       | 26        | 0       |
|         | Female | 11.0            | 119            | 17             | 0.43             | 87           | 42           | 90           | -2           | 10      | 22        | 0       |
|         | Female | 12.3            | 87             | 18             | 0.39             | 70           | 68           | 91           | -1           | 8       | 21        | 0       |
|         | Female | 12.0            | 103            | 18             | 0.38             | 67           | 63           | 81           | -2           | 13      | 18        | 0       |
| Group 4 | Male   | 15.9            | 176            | 21             | 0.41             | 113          | 324          | 533          | -3           | 6       | 101       | 0       |
|         | Male   | 15.9            | 219            | 18             | 0.39             | 157          | 60           | 94           | -4           | 8       | 61        | 0       |
|         | Male   | 16.1            | 273            | 20             | 0.44             | 193          | 87           | 101          | -5           | 9       | 52        | 0       |
|         | Female | 12.1            | 138            | 19             | 0.38             | 65           | 59           | 99           | -4           | 10      | 66        | 0       |
|         | Female | 12.7            | 138            | 18             | 0.47             | 93           | 64           | 103          | -2           | 8       | 30        | 0       |
|         | Female | 10.9            | 117            | 16             | 0.46             | 101          | 66           | 95           | -3           | 14      | 37        | 0       |

ALK = Alkaline Phosphatase

ALT = Alanine Aminotransferase

AST = Aspartate Aminotransferase

PHOS = Phosphorus (inorganic)

GLU = Glucose

GGTL = Gamma-Glutamyl Transferase Level

CREAT = Creatinine

BUN = Blood Urea Nitrogen

**Table S6.** Normal values, Sprague Dawley 15-16 week old males (N = 20)

| <b>Clinical Chemistry</b>                        |                       |             |                |
|--------------------------------------------------|-----------------------|-------------|----------------|
|                                                  | <b>Units</b>          | <b>Mean</b> | <b>Std Dev</b> |
| Glucose                                          | mg/dL                 | 118.4       | 30.4           |
| Blood Urea Nitrogen (BUN)                        | mg/dL                 | 17.8        | 1.9            |
| Creatinine                                       | mg/dL                 | 0.4         | 0.1            |
| BUN/Creatinine                                   | Ratio                 | 45.6        | 6.6            |
| Cholesterol                                      | mg/dL                 | 114.9       | 11.6           |
| Total Protein (TP)                               | g/dL                  | 6.5         | 0.2            |
| Albumin (Alb)                                    | g/dL                  | 4.2         | 0.2            |
| Globulin (Glb)                                   | g/dL                  | 2.3         | 0.1            |
| Alb/Glb                                          | Ratio                 | 1.8         | 0.1            |
| Total Bilirubin                                  | mg/dL                 | 0.1         | 0.0            |
| Alkaline Phosphatase (ALP)                       | U/L                   | 65.5        | 10.1           |
| Aspartate Aminotransferase (AST)                 | U/L                   | 118.1       | 56.7           |
| Alanine Aminotransferase (ALT)                   | U/L                   | 56.7        | 11             |
| AST/ALT                                          | Ratio                 | 2.1         | 0.9            |
| Calcium (Ca)                                     | mg/dL                 | 10.9        | 0.5            |
| Phosphorus (P)                                   | mg/dL                 | 9.0         | 0.7            |
| Sodium (Na)                                      | mmol/L                | 146.8       | 2.9            |
| Potassium (K)                                    | mmol/L                | 6.4         | 0.7            |
| Chloride (Cl)                                    | mmol/L                | 96.7        | 2.4            |
| HCO <sub>3</sub>                                 | mmol/L                | 42.4        | 3.6            |
| Anion Gap                                        | mmol/L                | 14.2        | 3.9            |
| <b>Hematology</b>                                |                       |             |                |
|                                                  | <b>Units</b>          | <b>Mean</b> | <b>Std Dev</b> |
| White Blood Cells (WBC)                          | x 10 <sup>3</sup> /uL | 7.5         | 2.6            |
| Red Blood Cells (RBC)                            | x 10 <sup>6</sup> /uL | 9.3         | 0.5            |
| Hemoglobin (Hgb)                                 | g/dL                  | 17.2        | 0.9            |
| Hematocrit (Hct)                                 | %                     | 58.1        | 2.8            |
| Mean Corpuscular Volume (MCV)                    | fL                    | 62.3        | 1.3            |
| Mean Corpuscular Hemoglobin (MCH)                | pg                    | 18.4        | 0.5            |
| Mean Corpuscular Hemoglobin Concentration (MCHC) | g/dL                  | 29.6        | 0.4            |
| Red Cell Distribution                            | %                     | 12.4        | 0.5            |
| Mean Platelet Volume (MPV)                       | fL                    | 0.9         | 0.6            |
| Segmented Neutrophils                            | %                     | 12.1        | 5.2            |



**Table S7.** Clinical Chemistry parameters (normal values, Sprague Dawley 15-16 week old females (N = 20))

| <b>Clinical Chemistry</b>                        |                       |             |                |
|--------------------------------------------------|-----------------------|-------------|----------------|
|                                                  | <b>Units</b>          | <b>Mean</b> | <b>Std Dev</b> |
| Glucose                                          | mg/dL                 | 92.2        | 16.6           |
| Blood Urea Nitrogen (BUN)                        | mg/dL                 | 17.1        | 2.8            |
| Creatinine                                       | mg/dL                 | 0.4         | 0.1            |
| BUN/Creatinine                                   | Ratio                 | 39.7        | 3.8            |
| Cholesterol                                      | mg/dL                 | 102.8       | 21.1           |
| Total Protein (TP)                               | g/dL                  | 6.4         | 0.3            |
| Albumin (Alb)                                    | g/dL                  | 4.4         | 0.2            |
| Globulin (Glb)                                   | g/dL                  | 2.0         | 0.2            |
| Alb/Glb                                          | Ratio                 | 2.2         | 0.2            |
| Total Bilirubin                                  | mg/dL                 | 0.2         | 0.1            |
| Alkaline Phosphatase (ALP)                       | U/L                   | 52.5        | 20             |
| Aspartate Aminotransferase (AST)                 | U/L                   | 172         | 110.1          |
| Alanine Aminotransferase (ALT)                   | U/L                   | 49.7        | 11.3           |
| AST/ALT                                          | Ratio                 | 3.3         | 1.5            |
| Calcium (Ca)                                     | mg/dL                 | 10.7        | 0.7            |
| Phosphorus (P)                                   | mg/dL                 | 8.8         | 0.9            |
| Sodium (Na)                                      | mmol/L                | 144.1       | 2.7            |
| Potassium (K)                                    | mmol/L                | 6.7         | 1.0            |
| Chloride (Cl)                                    | mmol/L                | 97.6        | 2.1            |
| HCO <sub>3</sub>                                 | mmol/L                | 38.9        | 4.0            |
| Anion Gap                                        | mmol/L                | 14.4        | 4.1            |
| <b>Hematology</b>                                |                       |             |                |
|                                                  | <b>Units</b>          | <b>Mean</b> | <b>Std Dev</b> |
| White Blood Cells (WBC)                          | x 10 <sup>3</sup> /uL | 6.7         | 2.0            |
| Red Blood Cells (RBC)                            | x 10 <sup>6</sup> /uL | 8.6         | 0.4            |
| Hemoglobin (Hgb)                                 | g/dL                  | 16.5        | 0.8            |
| Hematocrit (Hct)                                 | %                     | 54.2        | 2.6            |
| Mean Corpuscular Volume (MCV)                    | fL                    | 63.2        | 1.5            |
| Mean Corpuscular Hemoglobin (MCH)                | pg                    | 19.2        | 0.5            |
| Mean Corpuscular Hemoglobin Concentration (MCHC) | g/dL                  | 30.4        | 0.4            |
| Red Cell Distribution                            | %                     | 12.1        | 0.7            |
| Segmented Neutrophils                            | %                     | 10.3        | 4.0            |
| Lymphocytes                                      | %                     | 86.2        | 4.5            |
| Monocytes                                        | %                     | 1.8         | 0.9            |
| Eosinophils                                      | %                     | 1.3         | 0.9            |

## Technical data sheet for $^{14}\text{C}$ -labeled CA4+ 5\*.

**Specific Activity:** 8.7 mCi/mmol (5.82  $\mu\text{Ci}/\text{mg}$ )  
by gravimetric analysis

**Identification by MS:** Conforms

**Packaged:** 151.3  $\mu\text{Ci}$  (26 mg), white solid

**Total Batch Activity:** 151.3  $\mu\text{Ci}$

**Reserve:** 0.0  $\mu\text{Ci}$

**Radiochemical Purity:** >99% by HPLC on 03/12/2014

**Chemical Purity:** >98% by HPLC (UV<sub>245</sub>) on 03/12/2014

### HPLC

Luna C18, 5 $\mu\text{m}$ , 250 x 4.6mm

Mobile Phase: 0.05% TFA in water

Flow Rate: 1.0 mL / min., RC Flow Det.

Isocratic

**Stability and Storage Recommendation:** The exact rate of decomposition is unknown. However, it can be assumed that the product may decompose at a rate of approximately 1% per month when stored at -20°C in the original container.

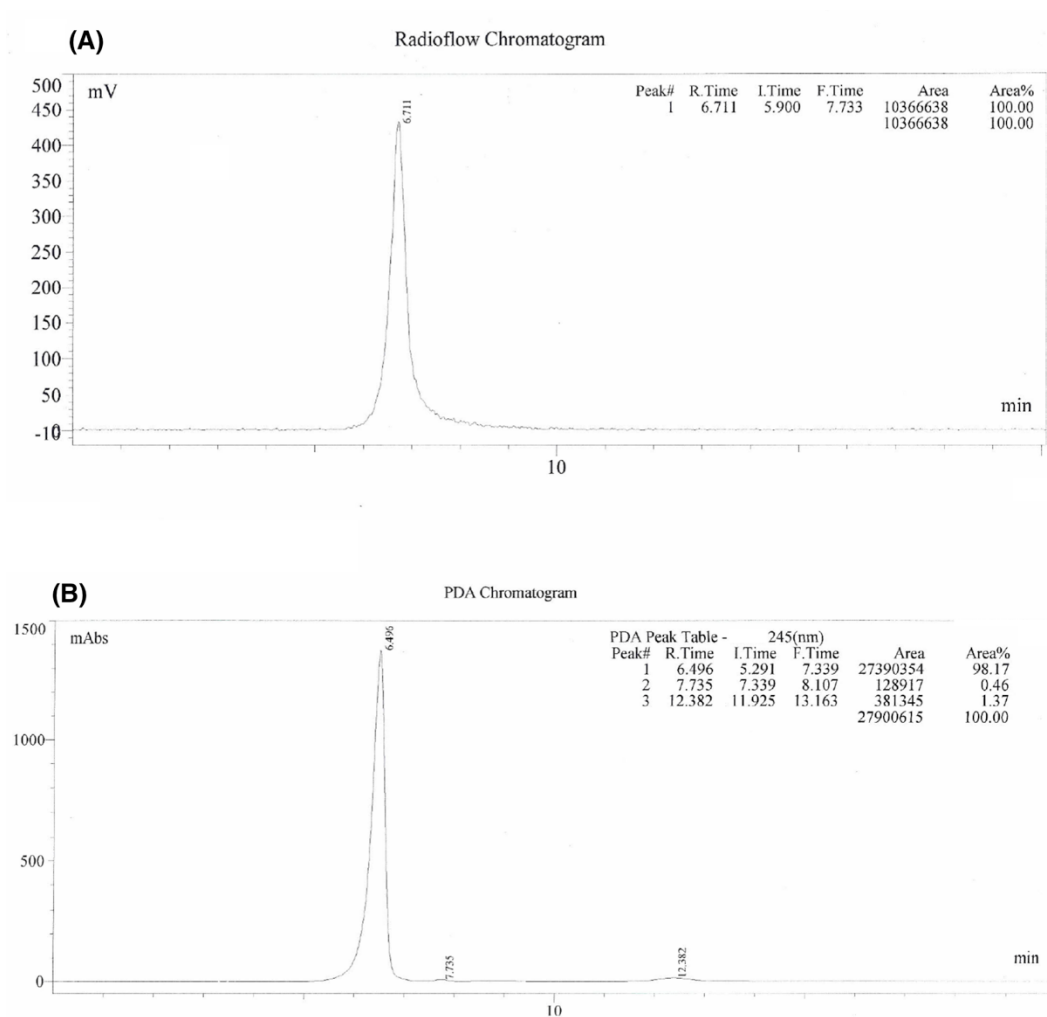

**Figure S15.** (A) Radioflow chromatogram (for radiochemical purity) and (B) PDA chromatogram (for chemical purity) for  $^{14}\text{C}$ -labeled CA4+ 5\*
